# Supplementary material for: Cornuside, identified in Corni fructus , suppresses melanin biosynthesis in B16/F10 melanoma cells through tyrosinase inhibition
Source: publisher site journal article supplement (doi:10.1515/tjb-2020-0033), 2020-05-05
Supplement: Supplementary file 1 [file j_tjb-2020-0033_suppl.docx]

Supplementary Section

Experimental

MTS (3-(4,5-dimethylthiazol-2-yl)-5-(3-carboxymethoxyphenyl)-2-(4-sulfophenyl)-2H tetrazolium) Assay in B16/F10 Melanoma Cells

The cells were seeded in a 96-well (2 × 104 cells/well) and treated with different doses of ECF for 24 h. After incubation, 20 μL of the MTS working solution (2 mg/mL in PBS) was added to each well and incubated at 37 °C for 4 h. Absorbance at 490 nm was measured using a microplate reader and cell viability was determined as the percentage of MTS reduction, assuming the absorbance of control cells as 100 %.

Tyrosinase Inhibition Assay

0.1 M phosphate buffer and 1.5 mM tyrosine were mixed in a test tube. Tyrosinase (1,500-2,000 U/mL) was added sequentially and reacted at 37 °C for 15 minutes. The absorbance was measured at 490 nm using an ELISA reader. Tyrosinase inhibitory activity was expressed by the decrease in absorbance between the OD490 value of the samples and the OD490 value of the control.

Measurement of Melanin Content

B16/F10 melanoma cells were dispensed in 6-well (1 × 106 cells/well) and incubated for 24 h, and then treated with 10 µM forskolin. After incubation for 48 h, 1N NaOH was added to the precipitate from which the cells were recovered. Absorbance was measured at 405 nm. Relative melanin contents were expressed by the decrease in absorbance between the OD405 value of the control and the OD405 value of the samples.

Ultra-Performance Liquid Chromatography (UPLC)-MS/MS

The *Corni fructus* was dried and extracted using hot water for 24 h. Using UPLC-MS/MS, cornuside was identified in the ECF. Later, cornuside was not directly extracted from ECF but purchased from Sigma-Aldrich. The UPLC-MS/MS was performed using a Waters Xevo TQ-S system (Waters, USA). Chromatographic separation was performed by injecting 5 μL supernatant onto a Waters ACQUITY BEH C8 column (100 mm × 2.1 mm, 1.7 μm, Waters, USA). Mobile phase: 0.1% formic acid, distilled water/0.1% formic acid, acetonitrile (A/B, v/v) as a gradient elution: 0min-5% B, 1min-5% B, 4min-100% B, 4.5min-100% B, 5min-5% B, 10min-5% B. The flow rate was 0.5 mL/min.
